# Supplementary material for: A novel bilayer heterogeneous poly(ionic liquid) electrolyte for high-performance flexible supercapacitors with ultraslow self-discharge
Source: Royal Society of Chemistry journal article supplement (doi:10.1039/d3mh00198a), 2023-01-01
Supplement: d3mh00198a1.pdf [file d3mh00198a1.pdf]

## Supporting Information

### **A Novel Bilayer Heterogeneous Poly(ionic liquid)s Electrolyte for High-Performance Flexible Supercapacitors with Ultraslow Self-Discharge**

Keyi Dong,<sup>a</sup> Yanan Liu,<sup>a</sup> Zilin Chen,<sup>a</sup> Tian Lv,<sup>a</sup> Weiyang Tang,<sup>a</sup> Shaokui Cao,<sup>b</sup> Tao Chen<sup>\*a</sup>

*<sup>a</sup>Shanghai Key Lab of Chemical Assessment and Sustainability, School of Chemical Science and Engineering, Tongji University, Shanghai 200092, P. R. China. E-mail: tchen@tongji.edu.cn*

*<sup>b</sup>School of Materials Science and Engineering, Zhengzhou University, Zhengzhou, 450001, China.*

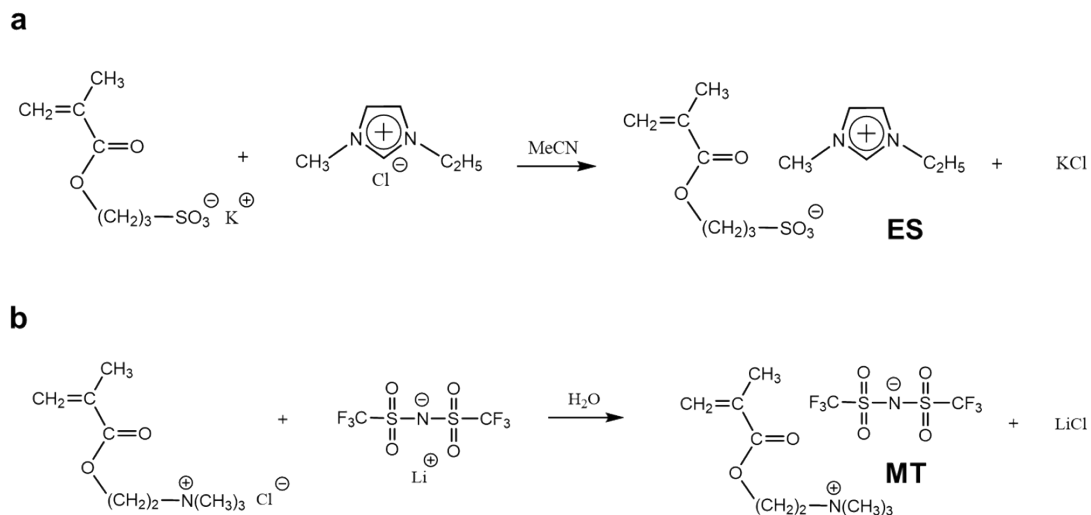

**Fig. S1** Synthesis scheme of ionic liquid monomers (a) ES and (b) MT.

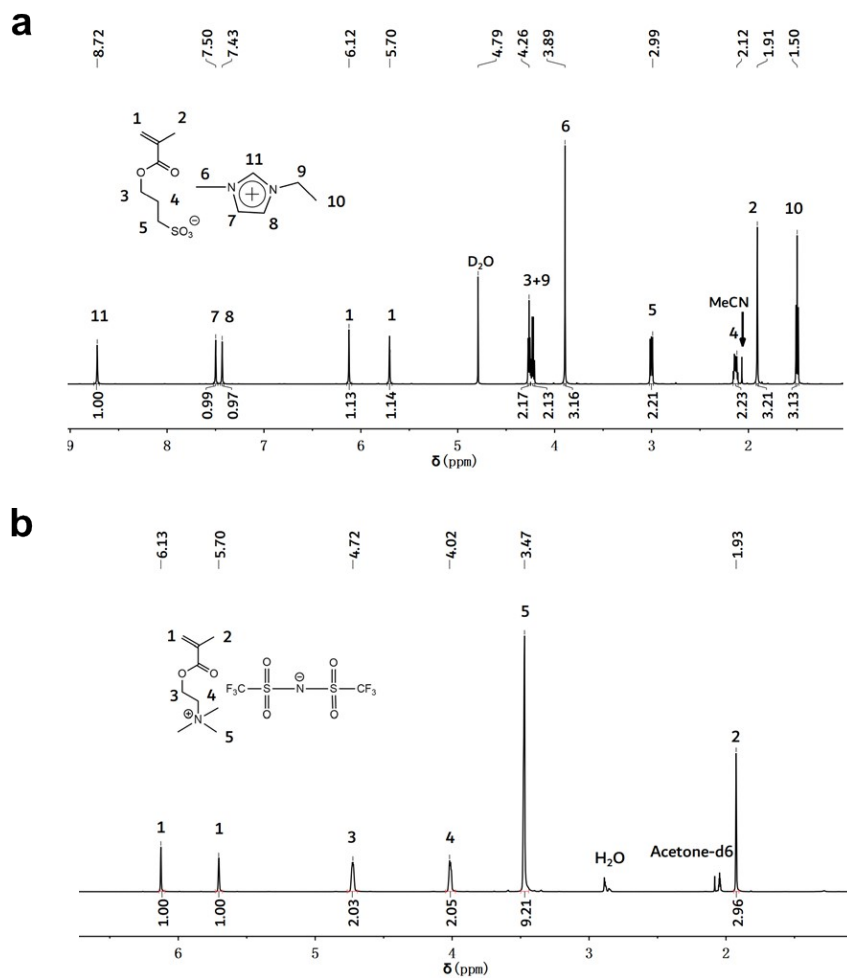

**Fig. S2**  $^1\text{H-NMR}$  spectrum of ionic liquid monomers (a) ES and (b) MT.

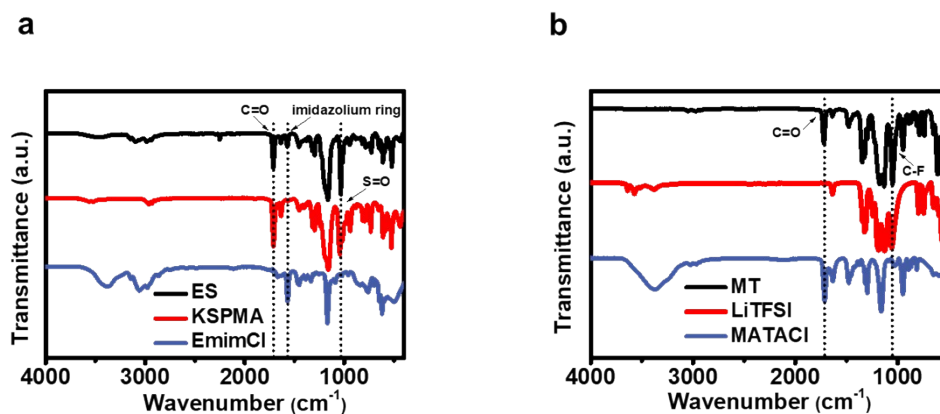

**Fig. S3** FTIR spectrum of ionic liquid monomers (a) ES and (b) MT.

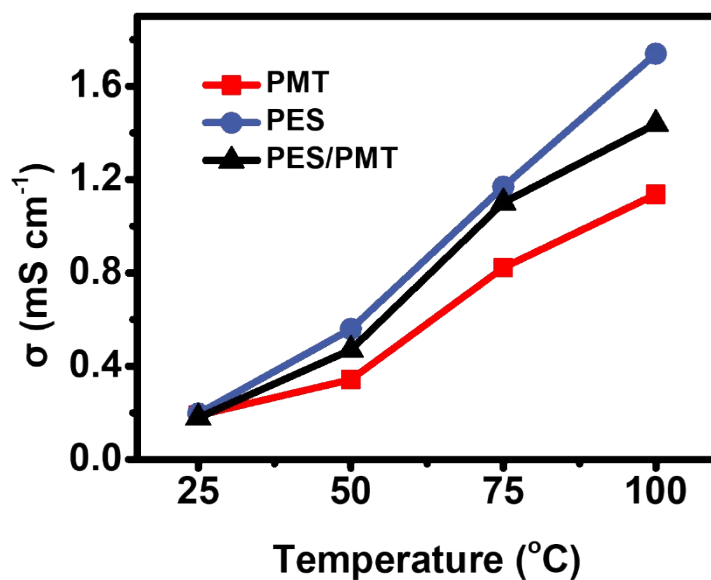

**Fig. S4** Ionic conductivities of BHPE and HPE as a function of temperature.

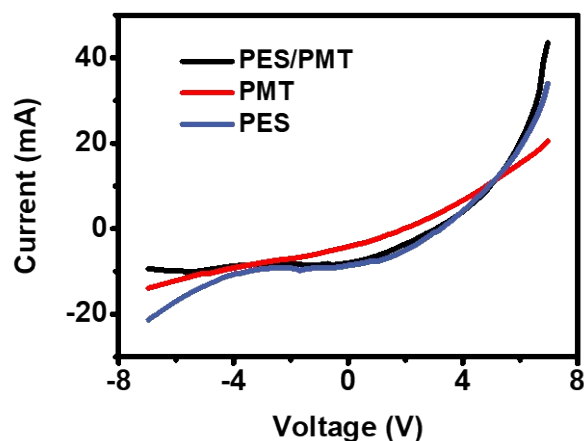

**Fig. S5** I-V curves ( $140 \text{ mV s}^{-1}$ ) of BHPE-based and HPE-based supercapacitors by using CNTs as electrodes.

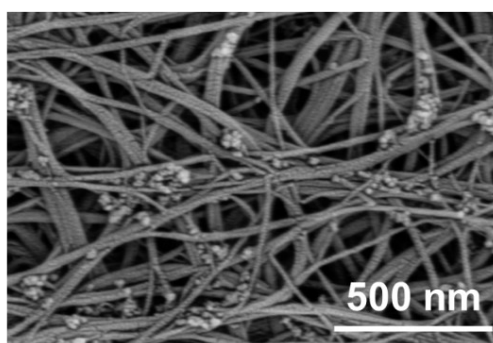

**Fig. S6** Top SEM images of CNTs films.

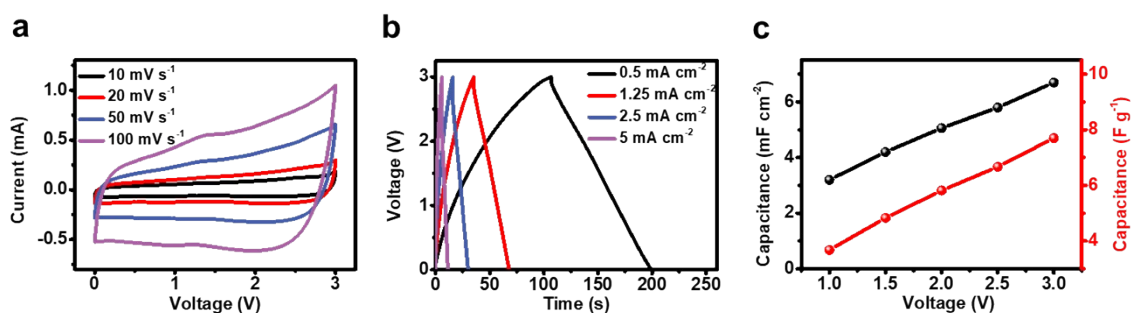

**Fig. S7** Electrochemical performance of CNTs//PMT/PES//CNTs supercapacitors. (a) CV curves at different scan rates. (b) GCD curves at different current densities. (c) Areal specific capacitance and mass specific capacitance obtained at a constant current density of  $0.5 \text{ mA cm}^{-2}$  as a function of the electrochemical window.

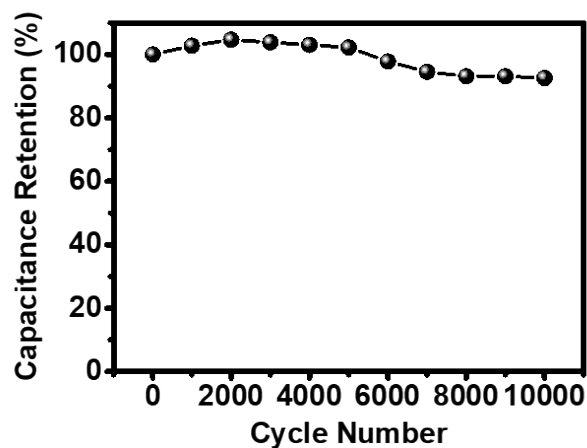

**Fig. S8** Cyclic performance of CNTs//PMT/PES//CNTs supercapacitors.

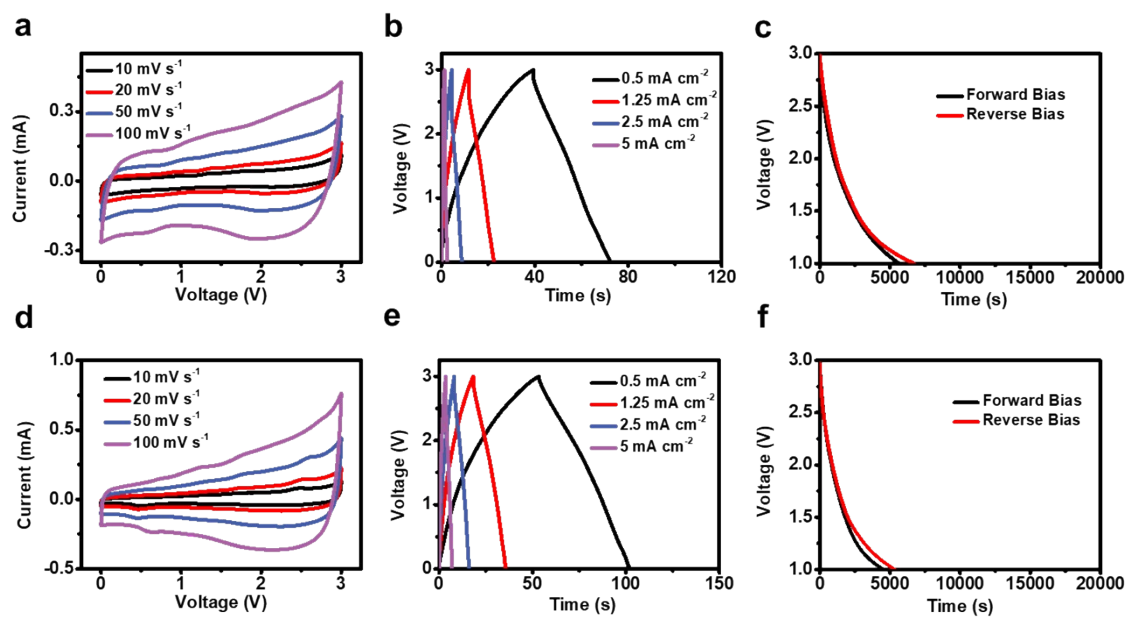

**Fig. S9** CV curves at different scanning rates, GCD curves at different current densities and self-discharge curves of supercapacitors based on HPE (a-c) PMT and (d-f) PES by using CNTs as electrodes.

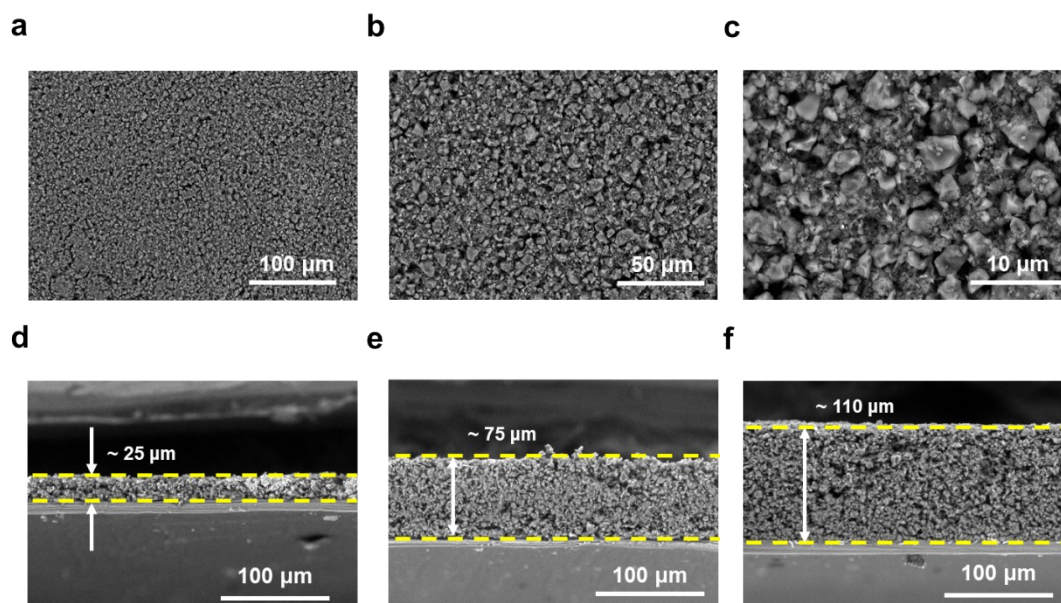

**Fig. S10** (a-c) Top SEM images of AC/CNTs films. Cross-sectional SEM images of AC with the thickness of (d) 25 μm, (e) 75 μm and (f) 110 μm.

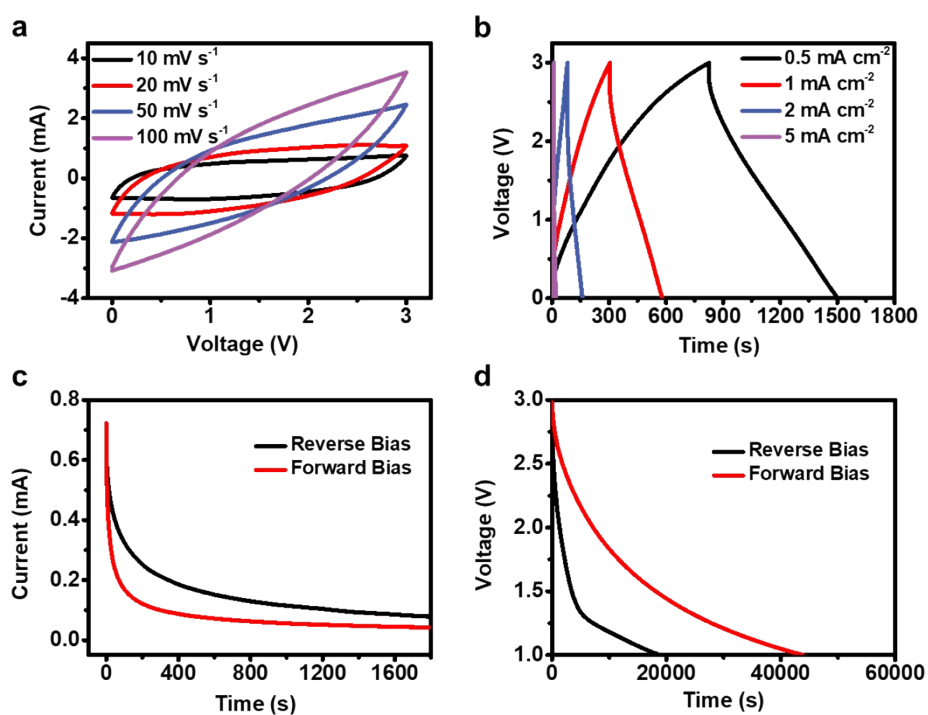

**Fig. S11** Electrochemical performance of AC//PMT/PES//AC supercapacitors (The thickness of AC is 25 μm). (a) CV curves at different scanning rates. (b) GCD curves at different current densities. (c) Leakage current curves and (d) self-discharge curves under forward bias and reverse bias.

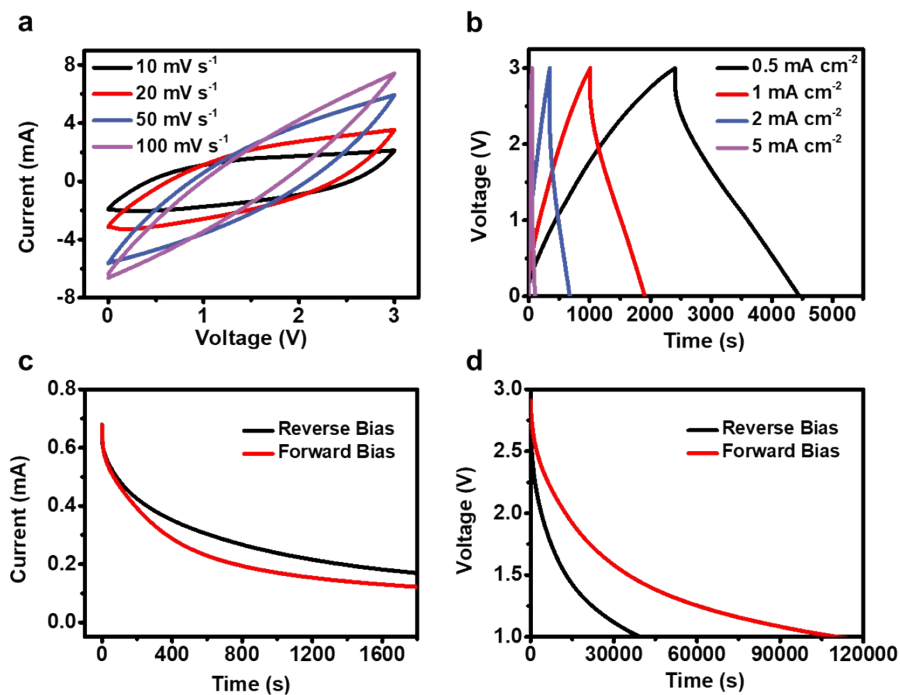

**Fig. S12** Electrochemical performance of AC//PMT/PES//AC supercapacitors (The thickness of AC is 110  $\mu\text{m}$ ). (a) CV curves at different scanning rates. (b) GCD curves at different current densities. (c) Leakage current curves and (d) self-discharge curves under forward bias and reverse bias.

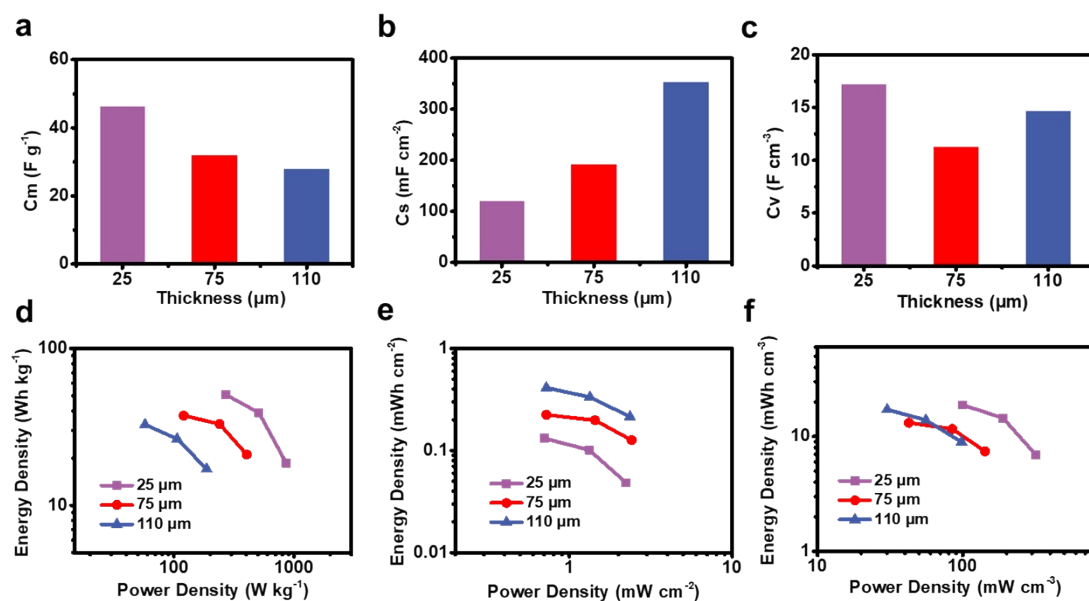

**Fig. S13** (a) Volume specific capacitance, (b) areal specific capacitance and (c) mass specific capacitance of BHPE-based supercapacitors by using AC/CNTs as electrodes with different thickness of AC under a current density of  $0.5 \text{ mA cm}^{-2}$ . (d-f) Ragone plots.

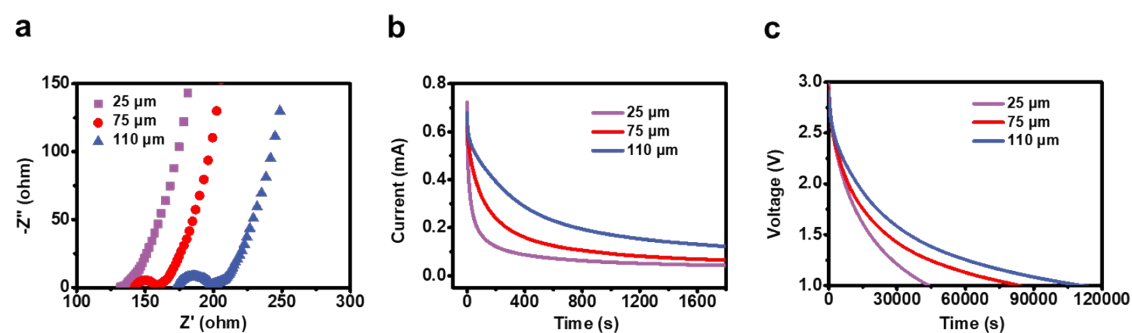

**Fig. S14** Electrochemical performance of BHPE-based supercapacitors by using AC/CNTs as electrodes with different thickness of AC. (a) Nyquist plots; (b) Leakage current curves; (c) Self-discharge curves.



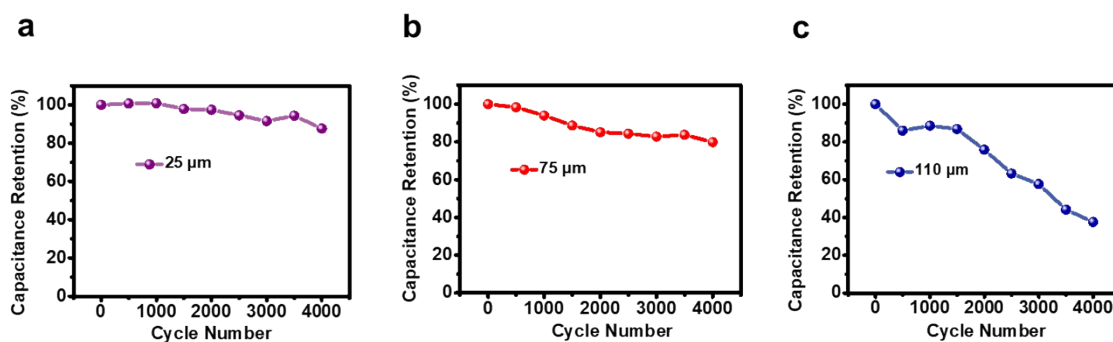

**Fig. S15** Cyclic performance of AC//PMT/PES//AC supercapacitors with different thickness of AC. (a) 25  $\mu\text{m}$ ; (b) 75  $\mu\text{m}$ ; (c) 110  $\mu\text{m}$ .

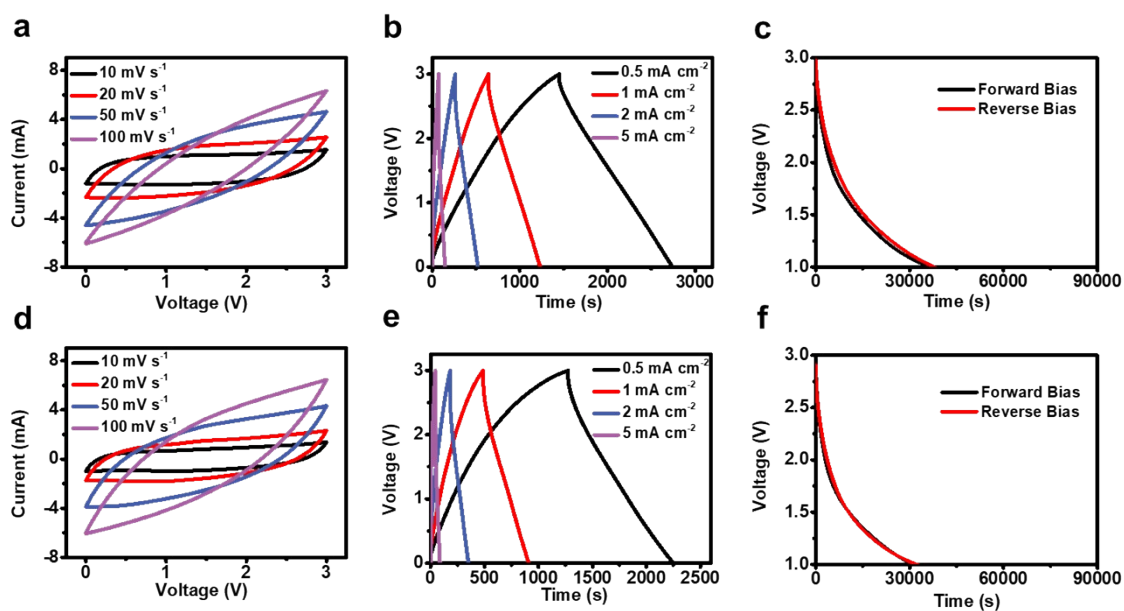

**Fig. S16** CV curves at different scanning rates, GCD curves at different current densities and self-discharge curves of supercapacitors based on HPE (a-c) PMT and (d-f) PES by using AC as electrodes.

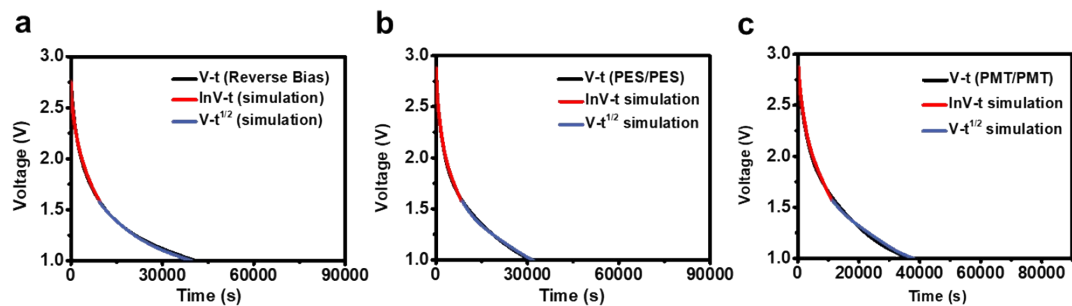

**Fig. S17** Simulation by the dual-mechanism model for AC//PMT/PES//AC supercapacitors under (a) forward bias. Simulation by the dual-mechanism model for supercapacitors based on HPE (b) PES and (c) PMT by using AC/CNTs as electrodes.

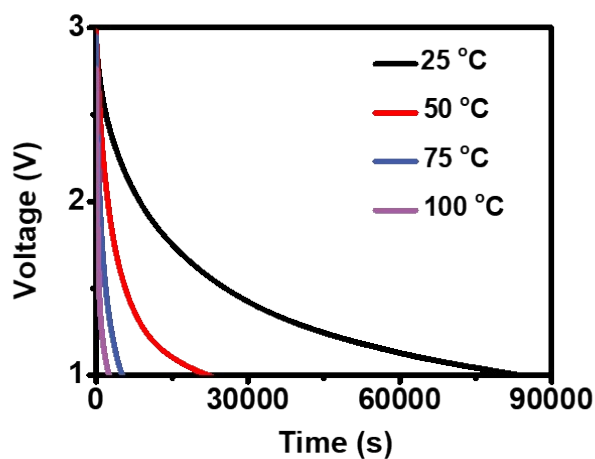

**Fig. S18** Self-discharge curves of a typical BHPE-based supercapacitor under forward bias measured at different temperatures.

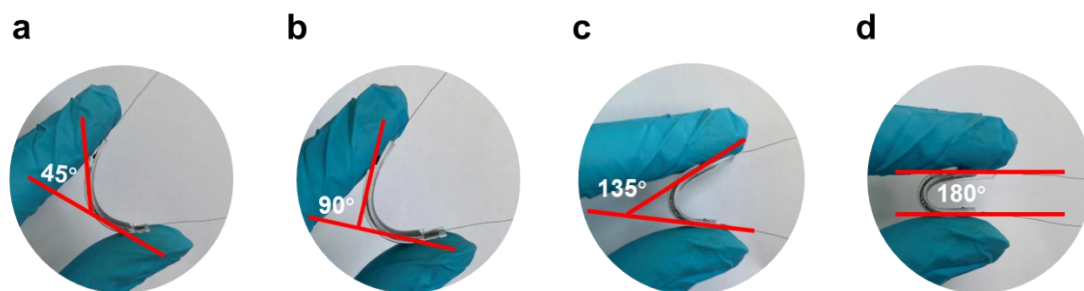

**Fig. S19** Digital images of flexible supercapacitors under different bending angles.

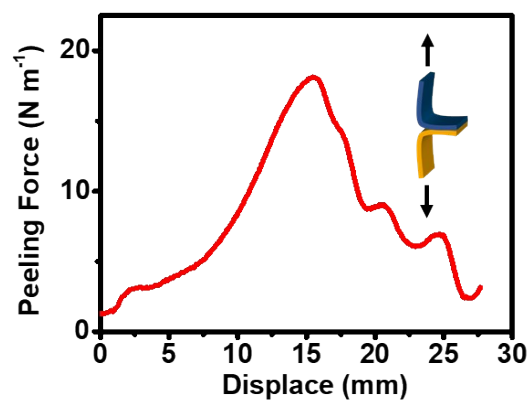

**Fig. S20** The peeling force curves of BHPE.

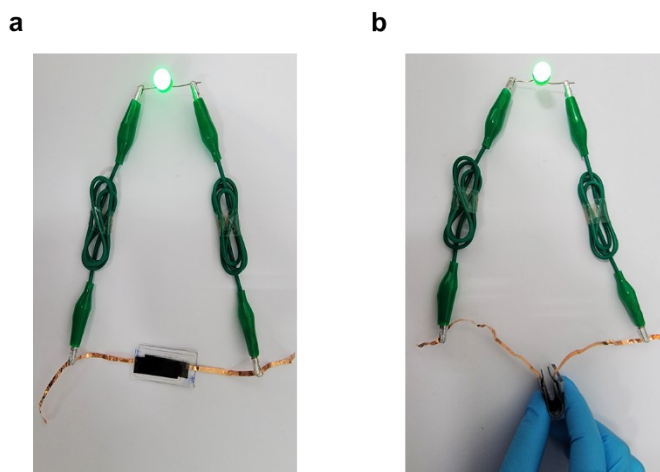

**Fig. S21** Digital photographs of a single supercapacitor powering a light-emitting diode under flat state (a) and being bent to 180° (b).

**Table S1** Comparison of electrochemical performance of our BHPE-based supercapacitors with those of supercapacitors with different ionic liquid as electrolytes.

| Electrode                                            | Electrolyte                                                       | Capacitance<br>(F g <sup>-1</sup> )<br>(Single<br>electrode) | Energy<br>density<br>(Wh kg <sup>-1</sup> ) | Power<br>density<br>(W kg <sup>-1</sup> ) | Current<br>density<br>(A g <sup>-1</sup> ) | Electro-<br>chemical<br>Window<br>(V) | Cycle Life<br>(Cycle number<br>and<br>capacitance<br>retention) | Ref.      |
|------------------------------------------------------|-------------------------------------------------------------------|--------------------------------------------------------------|---------------------------------------------|-------------------------------------------|--------------------------------------------|---------------------------------------|-----------------------------------------------------------------|-----------|
| AC/CNTs                                              | BHPE                                                              | 115                                                          | 33                                          | 240                                       | 0.17                                       | 3                                     | 4000, 80 %                                                      | this work |
| AC                                                   | PEGDA/TEGDME/LiTFSI/[Emim][TFSI]                                  | 105                                                          | 23                                          | 172                                       | 0.22                                       | 2.5                                   | 10000, 85 %                                                     | [S1]      |
| AC                                                   | PVA/Agar-[Emim][BF <sub>4</sub> ]-Li <sub>2</sub> SO <sub>4</sub> | 28.8                                                         | 4                                           | 150                                       | 0.3                                        | 1                                     | 10000, 80 %                                                     | [S2]      |
| PEDOT/CC                                             | PAAm/[Vmim][TFSI]                                                 | 52.26                                                        | 14.22                                       | 70                                        | -                                          | 1.4                                   | 3000, 93.4%                                                     | [S3]      |
| hierarchical porous AC                               | PVDF-HFP/[Emim][TFSI]                                             | 126-146                                                      | 21                                          | 110                                       | 0.5                                        | 2                                     | 10000, 82 %                                                     | [S4]      |
| AC                                                   | PVA/NaTf/[Emim][TF]                                               | 125.4                                                        | 12.4                                        | 198.4                                     | -                                          | 2                                     | 1000, 100 %                                                     | [S5]      |
| LiMn <sub>2</sub> O <sub>4</sub> //mesoporous carbon | LiTFSI/[Emim][TFSI]                                               | 50.7                                                         | 17.9                                        | 217.5                                     | 0.2                                        | 2                                     | 1000, 76 %                                                      | [S6]      |

**Table S2** Comparison of the self-discharge time of our BHPE-based supercapacitors with those of supercapacitors with different ionic liquid as electrolytes.

| Electrode                           | Electrolyte                                               | Range of voltage (V) | Time of Self-discharge (h) | Ref.      |
|-------------------------------------|-----------------------------------------------------------|----------------------|----------------------------|-----------|
| AC/CNTs                             | BHPE                                                      | 3-1                  | 23.2                       | this work |
| $\alpha$ -MnO <sub>2</sub> /N&S-rGO | PVDF-HFP [DEME][TFSI]                                     | 4.5-1.55             | 2                          | [S7]      |
| AC                                  | PVA/Na <sub>2</sub> SO <sub>4</sub> /Pyr <sub>14</sub> Br | 2-0.92               | 4                          | [S8]      |
| AC                                  | PVDF-HFP/[Bmim][CNTs]                                     | 2.2-0.79             | 5                          | [S9]      |
| AC                                  | [Emim][FcTFSI]                                            | 2-0.7                | 3.3                        | [S10]     |
| Porous nitrogen-doped graphene      | [Bmim][PF <sub>6</sub> ]                                  | 3-0.8                | 10                         | [S11]     |
| MnO <sub>2</sub> @CF//FeOOH/PPy@CF  | [Emim][TFSI]/FS                                           | 3.5-1                | 4                          | [S12]     |
| PProDOT//CMK-3                      | PMMA/PC/[Emim][TFSI]                                      | 1.5-0.05             | 0.13                       | [S13]     |
| PEDOP@MnO <sub>2</sub>              | PMMA/PC/[Bmim][CF <sub>3</sub> SO <sub>3</sub> ]          | 0.72-0.5             | 0.14                       | [S14]     |
| molten-salt method-derived graphene | [Emim][BF <sub>4</sub> ]                                  | 3-1.5                | 4.3                        | [S15]     |
| AC                                  | PVA/Li <sub>2</sub> SO <sub>4</sub> /BMIMI                | 1.5-0.64             | 6                          | [S16]     |

**Supporting Note. The electrochemical model based on Poisson–Boltzmann equation.**

Assuming a Boltzmann distribution of counterions and a uniform distribution of the fixed ions from polymer backbone, the electrostatic potential  $\varphi(z)$  along the  $z$ -axis of the BHPE can be described as:

$$\frac{\partial^2 \varphi(z)}{\partial z^2} = 8\pi l_b c_0 \sinh(\varphi(z)) - 4\pi l_b c_f$$

where  $c_0$  is the local density of positive (or negative) counterions at  $z = 0$ .  $c_f$  is the density of ionic groups of PILs.  $l_b = e^2 / (4\pi\epsilon T)$  is the Bjerrum length reflecting the strength of the electrostatic interaction relative to the entropic force present in the system, where  $\epsilon$  is the dielectric constant of the medium.  $T$  is the absolute temperature and  $e$  is the elementary charge. By introducing  $k_0^2 = 8\pi l_b c_0$  and  $k_f^2 = 4\pi l_b c_f$ , the Poisson–Boltzmann equation can be simplified as:

$$\frac{\partial^2 \varphi(z)}{\partial z^2} = k_0^2 \sinh(\varphi(z)) - k_f^2$$

The number of each of positive and negative counterions is conserved, so  $c_0$  can be defined as:

$$\int_0^{L/2} dz c_0 \exp(\varphi(z)) = \frac{c_f L}{2}$$

where  $L$  is the length of the simulation domain.

The system is symmetric with respect to  $z=0$ , so only the right half-domain ( $0 \leq z \leq L/2$ ) is taken into consideration. To solve the Poisson–Boltzmann equation, boundary conditions are applied to electrostatic potential: (i)  $\varphi(z)$  is zero at  $z=0$ . (ii)  $\varphi(z)$  is  $E_{\text{boundary}}$  at  $z=L/2$ .

## References

- S1 D. Lee, Y. Song, Y. Song, S. J. Oh, U. H. Choi and J. Kim, *Adv. Funct. Mater.*, 2021, **32**, 2109907.
- S2 H. Peng, X. Gao, K. Sun, X. Xie, G. Ma, X. Zhou and Z. Lei, *Chem. Eng. J.*, 2021, **422**, 130353.
- S3 T. Mao, S. Wang, Z. Yong, X. Wang, X. Wang, H. Chen, G. Liu, D. Wang and Z. Wang, *Chem. Eng. J.*, 2021, **417**, 129269.
- S4 A. A. Hor and S. A. Hashmi, *Electrochim. Acta*, 2020, **356**, 136826.
- S5 J. Wang, G. Chen and S. Song, *Electrochim. Acta*, 2020, **330**, 135322.
- S6 G. A. dos Santos Junior, V. D. S. Fortunato, G. G. Silva, P. F. R. Ortega and R. L. Lavall, *Electrochim. Acta*, 2019, **325**, 134900.
- S7 C. Poochai, C. Sriprachuabwong, J. Sodtipinta, J. Lohitkarn, P. Pasakon, V. Primpray, N. Maeboonruan, T. Lomas, A. Wisitsoraat and A. Tuantranont, *J. Colloid Interface Sci.*, 2021, **583**, 734-745.
- S8 C.-L. Geng, L.-Q. Fan, C.-Y. Wang, Y.-L. Wang, S.-J. Sun, Z.-Y. Song, N. Liu and J.-H. Wu, *New J. Chem.*, 2019, **43**, 18935-18942.
- S9 L.-Q. Fan, Q.-M. Tu, C.-L. Geng, Y.-L. Wang, S.-J. Sun, Y.-F. Huang and J.-H. Wu, *Int. J. Hydrogen Energy*, 2020, **45**, 17131-17139.
- S10 H. J. Xie, B. Gélinas and D. Rochefort, *Electrochem. Commun.*, 2016, **66**, 42-45.
- S11 D. Liu, C. Fu, N. Zhang, Y. Li, H. Zhou and Y. Kuang, *J. Solid State Electrochem.*, 2016, **21**, 759-766.
- S12 X. Gong, S. Li and P. S. Lee, *Nanoscale*, 2017, **9**, 10794-10801.
- S13 S. Deshagani, A. Das, D. Nepak and M. Deepa, *ACS Appl. Polym. Mater.*, 2020, **2**, 1190-1202.
- S14 A. Das, S. Deshagani, R. Kumar and M. Deepa, *ACS Appl. Mater. Interfaces*, 2018, **10**, 35932-35945.
- S15 J. Wang, B. Ding, X. Hao, Y. Xu, Y. Wang, L. Shen, H. Dou and X. Zhang, *Carbon*, 2016, **102**, 255-261.
- S16 Q.-M. Tu, L.-Q. Fan, F. Pan, J.-L. Huang, Y. Gu, J.-M. Lin, M.-L. Huang, Y.-F. Huang and J.-H. Wu, *Electrochim. Acta*, 2018, **268**, 562-568.
